# Supplementary material for: Comparison of Sigma 1 Receptor Ligands SA4503 and PRE084 to (+)-Pentazocine in the rd10 Mouse Model of RP
Source: PubMed Central journal article supplement — Invest Ophthalmol Vis Sci. 2020 Nov 2;61(13):3. doi: 10.1167/iovs.61.13.3 (PMC7645203; doi:10.1167/iovs.61.13.3), 2020-11-02
Supplement: iovs-61-13-3_s002.pdf [file iovs-61-13-3_s002.pdf]

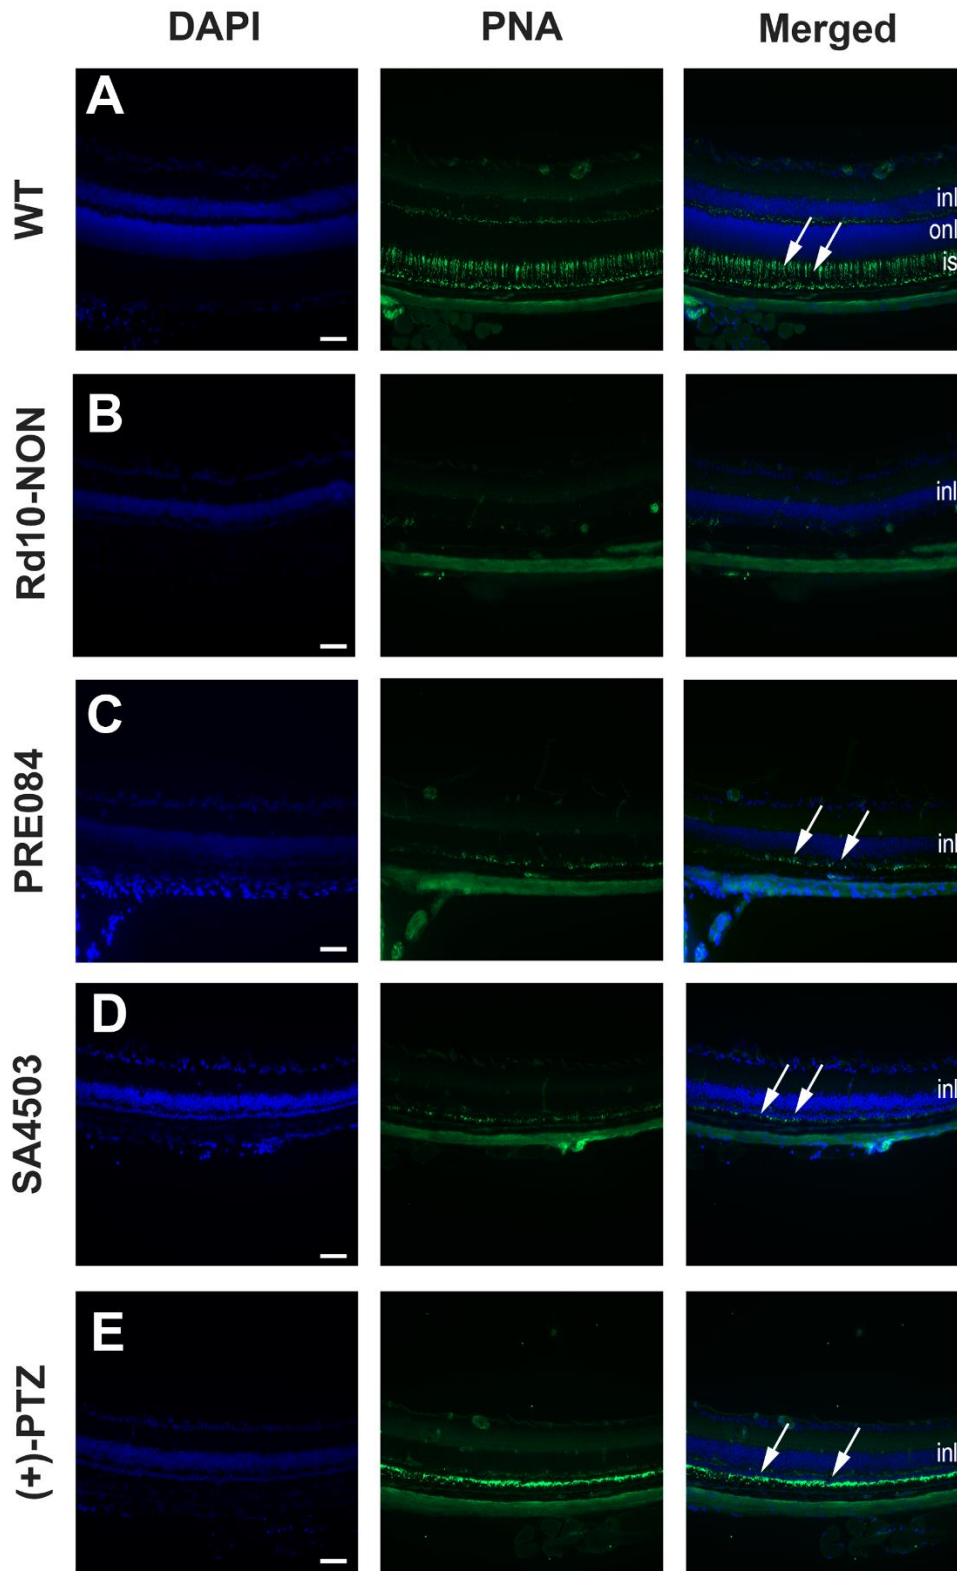

**Supplemental Figure. 2. Evaluation of cone photoreceptor labeling in *rd10* mice treated with SA4503, PRE084 or (+)-PTZ.** *Rd10* mice were administered SA4503, PRE084 or (+)-PTZ every

other day beginning at P14. Mice were euthanized at P42 and eyes prepared for histology. Immunodetection of FITC-conjugated peanut agglutinin (PNA), a green fluorescent marker of cone PRCs. Shown here are representative cryosections of (A) WT, (B) *rd10*-non, (C) *rd10*-SA4503, (D) *rd10*-PRE084, (E) *rd10*-(+)-PTZ mice. (Arrows in A, C-E point to green fluorescing cone inner segments.) Abbreviations: inl, inner nuclear layer; onl, outer nuclear layer; is, inner segments. Calibration bars = 50 $\mu$ m.
